# Supplementary material
Source: PubMed Central journal article supplement (PMC6657594)
Supplement: JB.00247-19-s0001.pdf [file JB.00247-19-s0001.pdf]

## Supplemental Material

### Single cell microscopy reveals that levels of cyclic di-GMP vary among *Bacillus subtilis* subpopulations

#### Authors and Affiliations:

Cordelia A. Weiss<sup>a</sup>, Jakob A. Hoberg<sup>a</sup>, Kuanqing Liu<sup>b</sup>, Benjamin P. Tu<sup>b</sup>, Wade C. Winkler<sup>a#</sup>

<sup>a</sup> Department of Cell Biology and Molecular Genetics, University of Maryland, College Park, Maryland, USA

<sup>b</sup> Department of Biochemistry, The University of Texas Southwestern Medical Center, Dallas, Texas, USA

#### Supplemental Material Contents:

|                                    | Pages                                                                                         |     |
|------------------------------------|-----------------------------------------------------------------------------------------------|-----|
| Figure S1                          | Schematic diagram of c-di-GMP regulation in <i>B. subtilis</i>                                | 2   |
| Figure S2                          | DNA sequences of the <i>IchAA</i> riboswitch reporter constructs                              | 3   |
| Figure S3                          | Fluorescence intensity per cell for Spinach2 RNA                                              | 4   |
| Figure S4                          | Comparison of P <sub>const</sub> -riboswitch- <i>yfp</i> for PY79 and 3610 <i>B. subtilis</i> | 5   |
| Figure S5                          | Quantification of intracellular cyclic di-GMP levels by LC-MS/MS                              | 6   |
| Table S1                           | Strains used in this study                                                                    | 7   |
| Supplemental Materials and Methods |                                                                                               | 8-9 |
| Supplemental References            |                                                                                               | 10  |

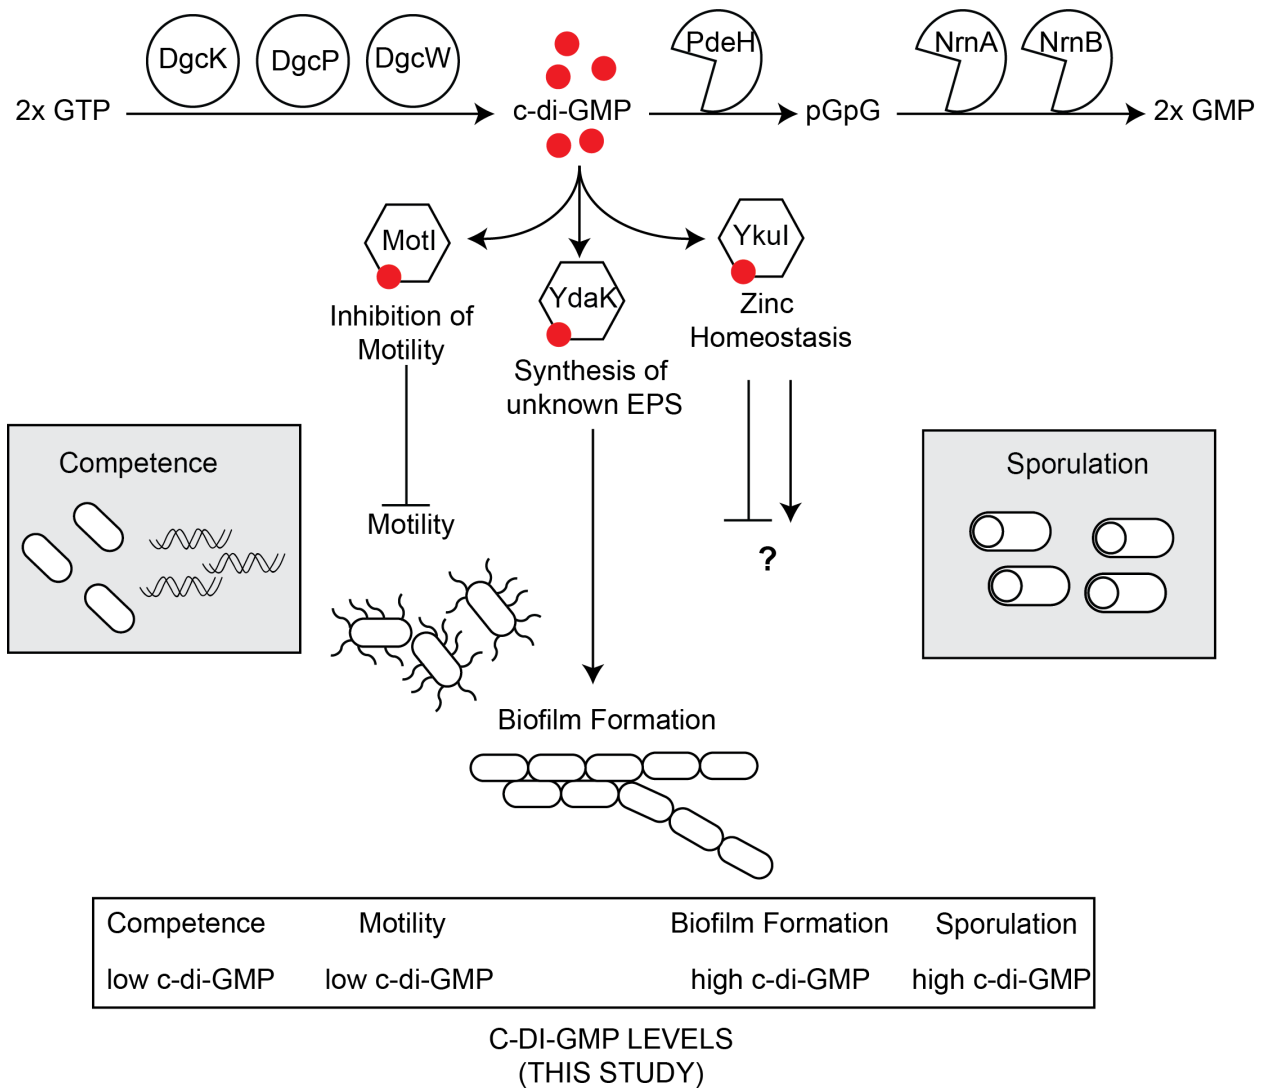

**Figure S1.** Schematic diagram of c-di-GMP regulation in *B. subtilis*. Diguanylate cyclases (DgcK, DgcP, DgcW) synthesize c-di-GMP from 2 GTP molecules. Phosphodiesterases (PdeH) hydrolyze c-di-GMP to pGpG, which is in turn hydrolyzed to 2 GMP molecules by RNases NrnA and NrnB. C-di-GMP binds effectors (MotI, YdaK, Ykul), which target cellular outcomes.

A. DNA Sequence of P<sub>T7</sub>-*lchAA* aptamer-Spinach2 used for fluorescence activation assays

5'-TAATACGACTCACTATAGGGCCCGGATAGCTCAGTCGGTAGAGCAGCGGCCGG  
**ATGTA****ACTGAATGAAATGGTGAAGGACGGGTCCAATGATAAAGGCAAACCTGCGGAAACGCAGGG**  
*ACGCAAAGCCATGGCCTAAGGTGCTGACGGTGCTACGGTTGACAGGTTGCCATTTGTTGAGTAGAG*  
**TGTGAGCTCCGTA****ACTAGTTACATCCGGCCGCGGGTCCAGGGTTC****AA****GTCCCTGTT****CGGGCGCCA**

B. DNA template sequence of P<sub>const</sub>-*lchAA* leader used for *in vitro* transcription termination assays

5'-CTACATCCAGAACAACCTCTGCTAAAATTCCTGAAAAATTTTCGAAAAAGTTGTT  
*GACTTTATCTACAAGGTGTGGCATAATGTGTGTGCAGCAGAAAATGAATTTATATCAAGAAAAGCAGA*  
*TAAAGGCAAACCTGCGGAAACGCAGGGACGCAAAGCCATGGCCTAAGGTGCTGACGGTGCTACGGT*  
*TGACAGGTTGCCGAATAAACAGGGAGTTCGCCCGTTTTTATTCGGGCGGGCTCTTTTCTTTTTATTTC*  
*CAATATAATGTTTTATTGGAAACGACAAATCTGTGACAGCGTTTTTCG*

C. DNA sequence of P<sub>const</sub>-*lchAA* leader-*yfp* reporter used for fluorescence microscopy

5'-GTAGCCCTTGCCCTACCTAGCTTCCAAGAAAGATATCCTTACAGCACAAGAGCGG  
**AA****GATGTTTTGTTCTACATCCAGAACAACCTCTGCTAAAATTCCTGAAAAATTTTCGAAAAAGTTGTT**  
*GACTTTATCTACAAGGTGTGGCATAATGTGTGTGCAGCAGAAAATGAATTTATATCAAGAAAAGCAGA*  
*TAAAGGCAAACCTGCGGAAACGCAGGGACGCAAAGCCATGGCCTAAGGTGCTGACGGTGCTACGGT*  
*TGACAGGTTGCCGAATAAACAGGGAGTTCGCCCGTTTTTATTCGGGCGGGCTCTTTTCTTTTTATTTC*  
*CAATATAATGTTTTATTGGAAACGACAAATCTGTGACAGCGTTTTTCGCTCATCGAAAACCGCAACAT*  
*TGCATTGCGGCTTGGCTGTTTCGCATCGTCATACATAACAAGAGATAAGCTTAAGGAGGAAAGTCACA*  
**TTATGAGCAAAGGTGAAGAACTGTTCA****CCGGCGTTGTGCCAATTCTGGTTGAGCTGGATGGTGACG**  
**TGA****ACTGATCTGTACCACCGGCAA****ACTGCCTGTTCCGTGGCCAACTCTGGTCACTACTCTGGGTT**  
**ACGGCCTGATGTGTTTTGCGCGTTACCGGATCACATGAAACAGCATGACTTCTTCAAATCTGCCA**  
**TGCCGGAAGGCTATGTCCAAGAACGTACGATCTTTTTCAAGGACGACGGCAA****ACTATAAAACCCGT**  
**GCCGAAGTTAAATTCGAGGGTGACACCCTGGTCAACCGCATCGAACTGAAAGGCATTGACTTCAA**  
**AGAGGACGGCAACATTCTGGGTCA****CAAGCTGGAATACA****ACTACA****ACTCCCACAACGTTTACATTAC**  
**TGCTGACAAGCAGAAAACGGCATCAAAGCAA****ACTTCAAGATCCGTCACAACATTGAAGATGGTG**  
**GCGTACAGCTGGCAGATCACTACCAGCAGA****AACTCCAATCGGTGATGGCCAGTACTGCTGCCA**  
**GATAACCATTACCTGTCCTACCAGAGCAA****ACTGTCTAAAGACCCGAACGAAAACGTGACCACAT**  
**GGTACTGCTGGAATTTGTTACCGCGGCAGGCATTACCCACGGTATGGACGAACTGTATAAATAAGC**  
**TAGCAAAAACCCCGCCCCTGACAGGGCGGGGTTTTTTTT-3'**

**Figure S2.** DNA sequences of (A) the *lchAA* riboswitch aptamer-Spinach2 construct, transcribed from a T7 promoter, (B) the *lchAA* riboswitch “run-off” construct used for *in vitro* transcription under expression of a bacterial P<sub>const</sub> promoter, and (C) the constitutively expressed *lchAA* riboswitch-*yfp* reporter construct used for all *in vivo* studies. For each sequence, the promoter is underlined at the 5' end, and all *lchAA* leader sequences are italicized. In panel A, Spinach2 is in bold. Additionally, a tRNA<sup>Lys</sup> scaffold sequence was added to aid in mRNA stability. In panel B, the terminator from the *lchAA* leader is also underlined. In panel C, the *yfp* ORF is in bold.

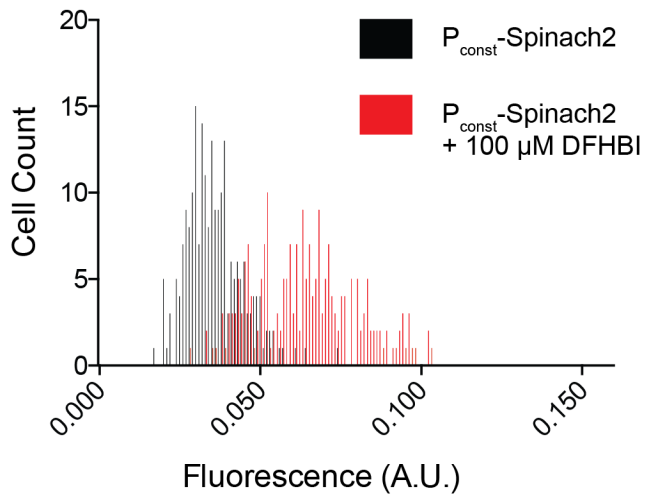

**Figure S3.** Quantification of the fluorescence intensity per cell of  $P_{const}$ -Spinach2 with the addition of 100  $\mu$ M DFHBI, compared to untreated cells, expressed in *B. subtilis* PY79 wild-type (n~300).

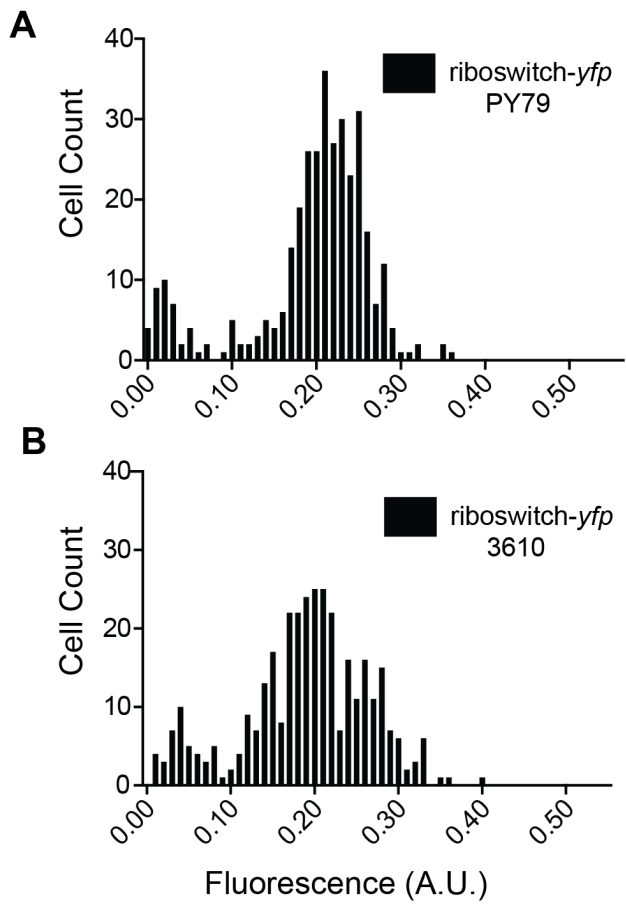

**Figure S4.** Quantification of fluorescence intensity per cell of  $P_{\text{const}}\text{-}lchAA\ \text{UTR-}yfp$  in *B. subtilis* wild-type strains (A) PY79, or (B) 3610, (n~350).

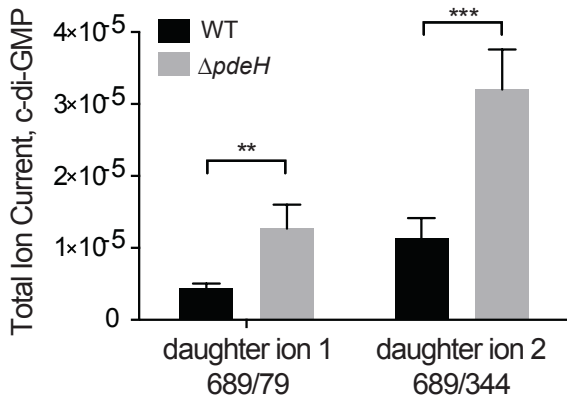

**Figure S5.** Quantification by LC-MS/MS of intracellular c-di-GMP levels in *B. subtilis* PY79 wild-type (WT) or  $\Delta pdeH$  in late-log phase ( $OD_{600}=1.0$ ). Results were obtained for two daughter ions. Error bars represent mean  $\pm$  SD ( $n=3$ ). Statistical significance determined by unpaired two-tailed Student's *t*-test.

**Table S1.**

| Strain            | Genotype                                                                                                        | Antibiotic Marker | Source     |
|-------------------|-----------------------------------------------------------------------------------------------------------------|-------------------|------------|
| PY79 <sup>a</sup> | Prototrophic derivative of wild-type <i>B. subtilis</i> 168                                                     |                   | (1)        |
| DS7187            | 3610 $\Delta comI$                                                                                              |                   | (2)        |
| Weiss9            | <i>amyE</i> <sup>b</sup> ::P <sub>const</sub> - <i>yfp</i>                                                      | <i>cat</i>        | This study |
| Weiss65           | 3610 $\Delta comI$ <i>amyE</i> ::P <sub>const</sub> - <i>lchAA</i> leader- <i>yfp</i>                           | <i>cat</i>        | This study |
| Weiss70           | <i>amyE</i> ::P <sub>const</sub> - <i>lchAA</i> leader- <i>yfp</i>                                              | <i>cat</i>        | This study |
| Weiss96           | <i>amyE</i> ::P <sub>hagA</sub> - <i>gfp</i>                                                                    | <i>cat</i>        | This study |
|                   | <i>thrC</i> <sup>c</sup> ::P <sub>const</sub> - <i>lchAA</i> leader- <i>mCherry</i>                             | <i>mls</i>        |            |
| Weiss97           | <i>amyE</i> ::P <sub>tapA</sub> - <i>yfp</i>                                                                    | <i>cat</i>        | This study |
|                   | <i>thrC</i> ::P <sub>const</sub> - <i>lchAA</i> leader- <i>mCherry</i>                                          | <i>mls</i>        |            |
| Weiss117          | <i>amyE</i> ::P <sub>const</sub> - <i>lchAA</i> leader <sup><math>\Delta apt(1-65 nt)</math></sup> - <i>yfp</i> | <i>cat</i>        | This study |
| Weiss162          | <i>amyE</i> ::P <sub>const</sub> - <i>lchAA</i> leader- <i>yfp</i>                                              | <i>cat</i>        | This study |
|                   | $\Delta pdeH$ :: <i>mls</i>                                                                                     | <i>mls</i>        |            |
| Weiss163          | <i>amyE</i> ::P <sub>const</sub> - <i>yfp</i>                                                                   | <i>cat</i>        | This study |
|                   | $\Delta pdeH$ :: <i>mls</i>                                                                                     | <i>mls</i>        |            |
| Weiss171          | $\Delta pdeH$ :: <i>mls</i>                                                                                     | <i>mls</i>        | This study |
| Weiss173          | <i>amyE</i> ::P <sub>comG</sub> - <i>yfp</i>                                                                    | <i>cat</i>        | This study |
|                   | <i>thrC</i> ::P <sub>const</sub> - <i>lchAA</i> leader- <i>mCherry</i>                                          | <i>mls</i>        |            |
| Weiss209          | $\Delta pdeH$ <i>amyE</i> ::P <sub>tapA</sub> - <i>yfp</i>                                                      | <i>cat</i>        | This study |
|                   | <i>thrC</i> ::P <sub>const</sub> - <i>lchAA</i> leader- <i>mCherry</i>                                          | <i>mls</i>        |            |
| Weiss210          | $\Delta pdeH$ <i>amyE</i> ::P <sub>comG</sub> - <i>yfp</i>                                                      | <i>cat</i>        | This study |
|                   | <i>thrC</i> ::P <sub>const</sub> - <i>lchAA</i> leader- <i>mCherry</i>                                          | <i>mls</i>        |            |
| Weiss211          | $\Delta pdeH$ <i>amyE</i> ::P <sub>hagA</sub> - <i>gfp</i>                                                      | <i>cat</i>        | This study |
|                   | <i>thrC</i> ::P <sub>const</sub> - <i>lchAA</i> leader- <i>mCherry</i>                                          | <i>mls</i>        |            |
| Weiss246          | <i>amyE</i> ::P <sub>const</sub> -spinach2-tRNA <sup>Lys</sup> -scaffold                                        | <i>cat</i>        | This study |
| Weiss273          | $\Delta sinR$ <i>amyE</i> ::P <sub>hagA</sub> - <i>gfp</i>                                                      | <i>cat</i>        | This study |
|                   | <i>thrC</i> ::P <sub>const</sub> - <i>lchAA</i> leader- <i>mCherry</i>                                          | <i>mls</i>        |            |
| Weiss274          | $\Delta spo0A$ <i>amyE</i> ::P <sub>hagA</sub> - <i>gfp</i>                                                     | <i>cat</i>        | This study |
|                   | <i>thrC</i> ::P <sub>const</sub> - <i>lchAA</i> leader- <i>mCherry</i>                                          | <i>mls</i>        |            |
| Weiss275          | $\Delta sigD$ <i>amyE</i> ::P <sub>hagA</sub> - <i>gfp</i>                                                      | <i>cat</i>        | This study |
|                   | <i>thrC</i> ::P <sub>const</sub> - <i>lchAA</i> leader- <i>mCherry</i>                                          | <i>mls</i>        |            |
| Weiss287          | <i>amyE</i> ::P <sub>pdeH</sub> - <i>sf</i> <i>gfp</i>                                                          | <i>cat</i>        | This study |
| Weiss288          | $\Delta spo0A$ <i>amyE</i> ::P <sub>pdeH</sub> - <i>sf</i> <i>gfp</i>                                           | <i>cat</i>        | This study |
| Weiss290          | $\Delta sinR$ <i>amyE</i> ::P <sub>pdeH</sub> - <i>sf</i> <i>gfp</i>                                            | <i>cat</i>        | This study |
| Weiss292          | $\Delta sigD$ <i>amyE</i> ::P <sub>pdeH</sub> - <i>sf</i> <i>gfp</i>                                            | <i>cat</i>        | This study |

<sup>a</sup> All strains are derivatives of PY79 unless otherwise noted

<sup>b</sup> Integration at *amyE* locus was performed with plasmids derived from pDG1662 (Bacillus Genetic Stock Center)

<sup>c</sup> Integration at *thrC* locus was performed with plasmids derived from pDG1664 (Bacillus Genetic Stock Center)

## Supplemental Materials and Methods

### *Fluorescence microscopy & quantification*

Single colonies were used to inoculate liquid MSgg medium (3) and grown at 37°C shaking overnight. The following morning, cultures of each strain were inoculated 1:50 in fresh medium and grown at 37°C shaking until reaching an optical density at 600 nm ( $OD_{600}$ ) of 1.0. To assess Spinach2 fluorescence, DFHBI was added to each culture to achieve a final concentration of 100  $\mu$ M and cultures were allowed to shake at 37°C in the dark for an additional hour. Otherwise, aliquots of these cultures were then placed on 1.5% low-melting agarose MSgg pads and allowed to dry for 10 minutes. Agarose pads were inverted onto a glass bottom dish (Willco Wells). Cells were imaged at room temperature using a Zeiss Axio-Observer Z1 inverted fluorescence microscope, equipped with a Rolera EM-C<sub>2</sub> electron-multiplying charge-coupled (EMCC) camera, enclosed within a temperature-controlled environmental chamber. Fluorescence intensity per cell was quantified using Oufiti analysis software (4). Images were analyzed and adjusted with FIJI software (5).

### *Metabolite extraction and quantification of c-di-GMP in B. subtilis*

Three independent replicates of *B. subtilis* PY79 WT and  $\Delta pdeH::mIs$  were grown overnight in liquid MSgg medium (3) shaking at 37°C. The following day cultures of each strain were inoculated (1:50) into fresh MSgg and agitated at 37°C until reaching an optical density at 600 nm ( $OD_{600}$ ) of 1.0. Metabolite extraction was performed as described previously (6). 5 mLs of each culture were passed through 0.2  $\mu$ m nylon filters (EMD Millipore). Metabolites were extracted by inverting the filters into petri dishes that contained 1.5 mL pre-chilled extraction solvent composed of 40:40:20 acetonitrile/methanol/water. Dishes were placed on dry ice for 15 minutes before the wash was collected and spun at max speed for 5 minutes at 4°C. The supernatant was then placed in a vacuum centrifuge until metabolite extracts were dry. Detection of c-di-GMP by LC-MS/MS was previously described (7). Briefly, bacterial extract was resuspended in Solvent A (10 mM tributylamine in water, pH 5.0) and centrifuged twice to remove insoluble particles. Metabolites were then separated on a



Synergi Fusion-RP column (4  $\mu\text{m}$  particle size, 80  $\text{\AA}$  pore size, 150 mm x 2 mm, Phenomenex) using a Shimadzu high performance liquid chromatography machine and simultaneously analyzed by a triple quadrupole mass spectrometer (3200 QTRAP, ABSCIEX). The total run time was 20 min at a binary flow rate of  $0.5 \text{ ml min}^{-1}$ , with 10 mM tributylamine in water (pH 5.0) as Solvent A and 100% methanol as Solvent B. The following gradient was performed: 0.01 min, 0% B, 4 min, 0% B, 11 min, 50% B, 13 min, 100% B, 15 min, 100% B, 16 min, 0% B, 20 min, 0% B. C-di-GMP and pGpG were detected by multiple reaction monitoring (MRM) under negative mode using the ion pairs 689/79 and 689/344 (c-di-GMP). C-di-GMP was quantified using the Analyst<sup>®</sup> software (version 1.6.2) by calculating the total peak area and normalized by total ion current (TIC). Authentic c-di-GMP standards were injected and analyzed alongside samples.

## Supplemental References

1. Youngman P, Perkins JB, Losick R. 1984. Construction of a cloning site near one end of Tn917 into which foreign DNA may be inserted without affecting transposition in *Bacillus subtilis* or expression of the transposon-borne *erm* gene. *Plasmid* 12:1–9.
2. Konkol MA, Blair KM, Kearns DB. 2013. Plasmid-Encoded ComI Inhibits Competence in the Ancestral 3610 Strain of *Bacillus subtilis*. *Journal of Bacteriology* 195:4085–4093.
3. Branda SS, González-Pastor JE, Ben-Yehuda S, Losick R, Kolter R. 2001. Fruiting body formation by *Bacillus subtilis*. *Proceedings of the National Academy of Sciences* 98:11621–11626.
4. Paintdakhi A, Parry B, Campos M, Irnov I, Elf J, Surovtsev I, Jacobs-Wagner C. 2016. Oufiti: an integrated software package for high-accuracy, high-throughput quantitative microscopy analysis. *Molecular microbiology* 99:767–777.
5. Schindelin J, Arganda-Carreras I, Frise E, Kaynig V, Longair M, Pietzsch T, Preibisch S, Rueden C, Saalfeld S, Schmid B, Tinevez J-Y, White DJ, Hartenstein V, Eliceiri K, Tomancak P, Cardona A. 2012. Fiji - an Open Source platform for biological image analysis. *Nat Methods* 9.
6. Liu K, Myers AR, Pisithkul T, Claas KR, Satyshur KA, Amador-Noguez D, Keck JL, Wang JD. 2015. Molecular mechanism and evolution of guanylate kinase regulation by (p)ppGpp. *Mol Cell* 57:735–749.
7. Tu BP, Mohler RE, Liu JC, Dombek KM, Young ET, Synovec RE, McKnight SL. 2007. Cyclic changes in metabolic state during the life of a yeast cell. *PNAS* 104:16886–16891.
